# Supplementary material for: Sensing and discrimination of cyanide and hydrogen sulfide using an 8-alkenyl-4,4-difluoro-4-bora-3a,4a-diaza-s-indacene derivative
Source: Royal Society of Chemistry journal article supplement (doi:10.1039/c5ra23307k), 2015-12-11
Supplement: c5ra23307k1.pdf [file c5ra23307k1.pdf]

## Sensing and discrimination of cyanide and hydrogen sulfide using an 8-alkenyl-4,4-difluoro-4-bora-3a,4a-diaza-s-indacene derivative

Enrique Alvarado-Martínez<sup>c</sup>, Ana M. Costero<sup>\*a,b</sup>, Salvador Gil<sup>a,b</sup>, Eduardo Peña-Cabrera<sup>c</sup>,

### General Methods

<sup>1</sup>H and <sup>13</sup>C NMR spectra were recorded on a 200 or 300 MHz spectrometers in deuteriochloroform (CDCl<sub>3</sub>) with either tetramethylsilane (TMS) (0.00 ppm <sup>1</sup>H, 0.00 ppm <sup>13</sup>C) or chloroform (7.26 ppm <sup>1</sup>H, 77.00 ppm <sup>13</sup>C) as internal reference unless otherwise stated. Data are reported in the following order: chemical shift in ppm, multiplicities (br (broadened), s (singlet), d (doublet), t (triplet), q (quartet), sex (sextet), hex (hextet), m (multiplet), exch (exchangeable), app (apparent)), coupling constants, *J* (Hz), and integration. IR peaks are reported (cm<sup>-1</sup>) with the following relative intensities: s (strong, 67-100%), m (medium 40-67%), and w (weak 20-40%). UV-vis absorption spectra were recorded using a 1 cm path length quartz cuvette on a Shimadzu UV-2101PC spectrophotometer. All measurements were carried out at 293 K (thermostated).

### Starting materials

8-MethylthioBODIPY was donated by Cuantico de México ([www.cuantico.mx](http://www.cuantico.mx)), and CuTC,<sup>1</sup> was prepared according to the literature procedure. All of the other reactants, ligands, and catalysts were commercially available.

**Synthesis of compound 1.** An oven-dry Schlenk tube, equipped with a stir bar, was charged with the boronic acid (0.2520 mmol, 3 equiv), 8-methylthioBODIPY (0.0840 mmol, 20.0 mg, 1equiv) and dry THF (3.0 mL) under N<sub>2</sub>. The stirred solution was sparged with N<sub>2</sub> for 10 min, whereupon CuTC (0.2520 mmol, 3 equiv), Pd<sub>2</sub>(dba)<sub>3</sub> (2.5 mol %), and TFP (7.5 mol %) were added under N<sub>2</sub>. The reaction mixture was immersed into a pre-heated oil bath at 55 °C. After 1 hour, the reaction mixture was allowed to reach room temperature and was adsorbed on SiO<sub>2</sub>-gel. After flash-chromatography (SiO<sub>2</sub>-gel, 20% EtOAc/hexanes) purification, compound **1** was as obtained as a cherry solid. For purposes of characterization, the solid product was crystallized from CH<sub>2</sub>Cl<sub>2</sub>/petroleum ether. According to procedure. Reaction time 1h. TLC (20% EtOAc/hexanes) *R<sub>f</sub>* = 0.5; mp 175-

176 °C; yield = 80%; IR (KBr,  $\text{cm}^{-1}$ ) 1621 (w), 1547 (m), 1529 (w), 1489 (w), 1470 (w), 1411 (m), 1392 (m), 1268 (w), 1195 (w), 1121 (m), 1078 (s), 962 (m), 951 (m), 785 (w), 755(w);  $^1\text{H}$  NMR (300 MHz,  $\text{CDCl}_3$ ):  $\delta$  7.85 (s, 2H), 7.61-7.58 (m, 2H), 7.44-7.41 (m, 5H), 7.32 (d,  $J$  = 3Hz, 2H), 6.52 (d,  $J$  = 3Hz, 2H);  $^{13}\text{C}$  NMR (75 MHz,  $\text{CDCl}_3$ ):  $\delta$  145.0, 144.0, 143.2, 135.8, 134.1, 130.8, 129.4, 128.5, 128.2, 121.4, 118.1. HRMS ( $\text{M}^+$ ) ( $\text{C}_{17}\text{H}_{13}\text{BF}_2\text{N}_2$ ): calcd. 295.1213, found 295.1207.

**Synthesis of compound 2.** Compound **1** (20.0 mg, 0.068 mmol, 1 equiv) was dissolved in 2.7 mL of  $\text{CH}_3\text{CN}$ . Next, KCN (6.7 mg, 0.1020 mmol, 1.5 equiv) dissolved in 0.3 mL of  $\text{H}_2\text{O}$  was added to the solution and the mixture was stirring to room temperature. After TLC showed that the reaction went to completion, 5 mL of  $\text{H}_2\text{O}$  were added, the organic layer was extracted with EtOAc (2 x 10 mL), the organic phases were combined and washed with brine (2 x 10 mL). After, the organic phase was dried over  $\text{MgSO}_4$  anhydrous to be filtered and concentrated in vacuo. The residue was re-dissolved in EtOAc and was adsorbed on  $\text{SiO}_2$ -gel. After flash-chromatography ( $\text{SiO}_2$ -gel, EtOAc/hexanes gradient) purification, compound **2** was obtained as orange solid. For purposes of characterization, the solid product was crystallized from  $\text{CH}_2\text{Cl}_2$ /petroleum ether. According to procedure. Reaction time 1h. TLC (30% EtOAc/Hexanes)  $R_f$ =0.3; orange solid; mp 179-180 °C; yield = 84%; IR (KBr,  $\text{cm}^{-1}$ ): 3144 (w), 2246 (w), 1578 (s), 1413 (s), 1397 (s), 1264 (s), 1198 (m), 1119 (s), 1088 (s), 1078 (s), 1031 (m), 951 (m) 766 (m), 755 (m), 701 (m);  $^1\text{H}$ -NMR (200 MHz,  $\text{CDCl}_3$ ):  $\delta$  7.88 (s, 2H), 7.34-7.26 (m, 5H), 7.09 (d,  $J$  = 4Hz, 2H), 6.51 (d,  $J$  = 4Hz, 2H), 4.18-4.11 (m, 1H), 3.60-3.50 (m, 1H), 3.37-3.27 (m, 1H);  $^{13}\text{C}$ -NMR (50 MHz,  $\text{CDCl}_3$ ):  $\delta$  145.39, 142.17, 135.51, 134.38, 129.80, 129.38, 128.60, 127.58, 119.57, 119.15, 40.30, 37.28. HRMS ( $\text{M}^+$ ) ( $\text{C}_{18}\text{H}_{14}\text{BF}_2\text{N}_3$ ): calcd. 339.1587, found 339.1585.

### Chromogenic detection of anions

10 equivalents of  $\text{Cl}^-$ ,  $\text{I}^-$ ,  $\text{Br}^-$ ,  $\text{F}^-$ ,  $\text{HS}^-$ ,  $\text{SCN}^-$  and  $\text{CN}^-$ , anions were added to 3 mL aliquots of a  $1 \times 10^{-5}$  M acetonitrile solution of **1** and the mixtures were allowed to react at room temperature for 30 min. Then, the absorption intensity of the samples was measured. While hydrogen sulfide and cyanide anions are able to complete bleach of the solution, other anions ( $\text{Cl}^-$ ,  $\text{I}^-$ ,  $\text{Br}^-$ ,  $\text{F}^-$ ,  $\text{SCN}^-$ ) induced negligible changes in the visible band.

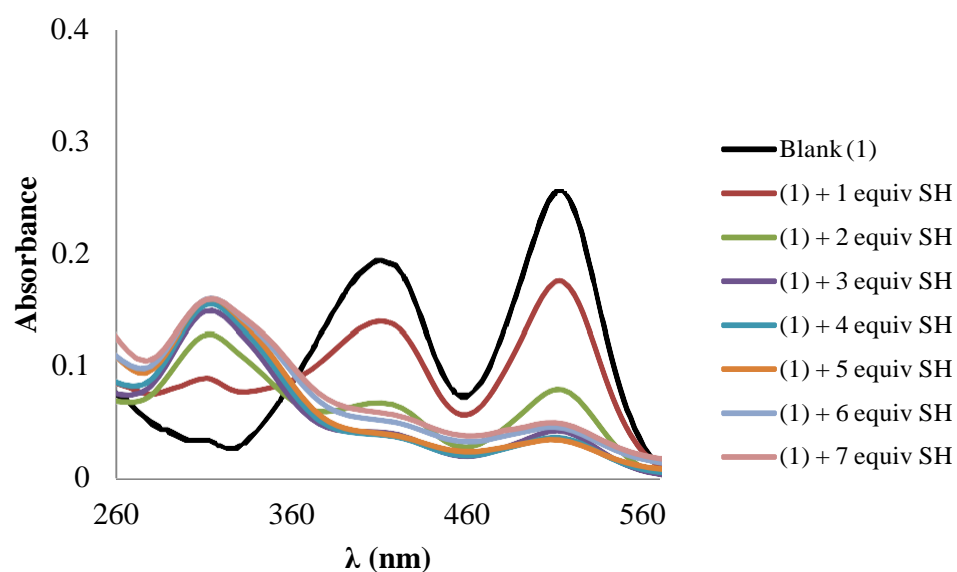

**Figure SI-1.** Titration of **1** ( $1 \times 10^{-5}$  M in  $\text{CH}_3\text{CN}$ ) with increasing amounts of NaHS ( $0$ – $1 \times 10^{-4}$  M in  $\text{H}_2\text{O}$ )

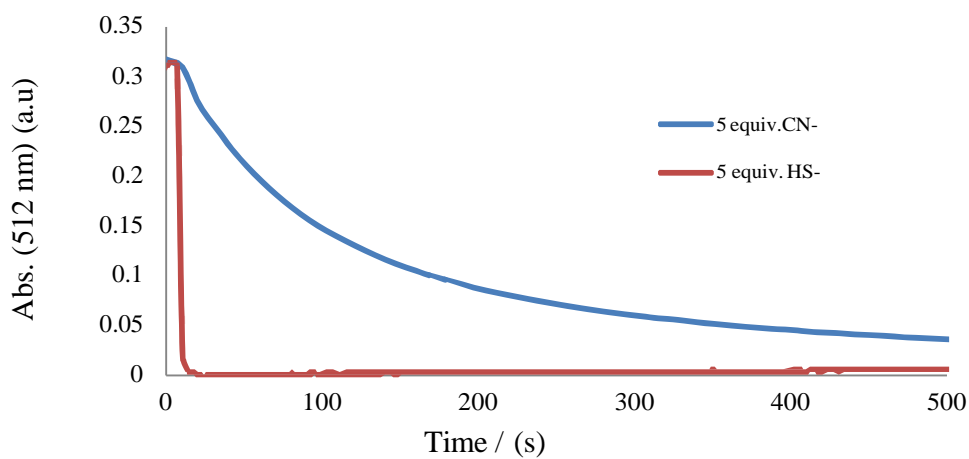

**Figure SI-2.** Kinetic plot of the absorption band at 512 nm of compound **1** ( $1 \times 10^{-5}$  M,  $\text{CH}_3\text{CN}$ ) in the presence of 5 equivalents of  $\text{CN}^-$  (blue line) and 5 equivalents of  $\text{HS}^-$  (red line).

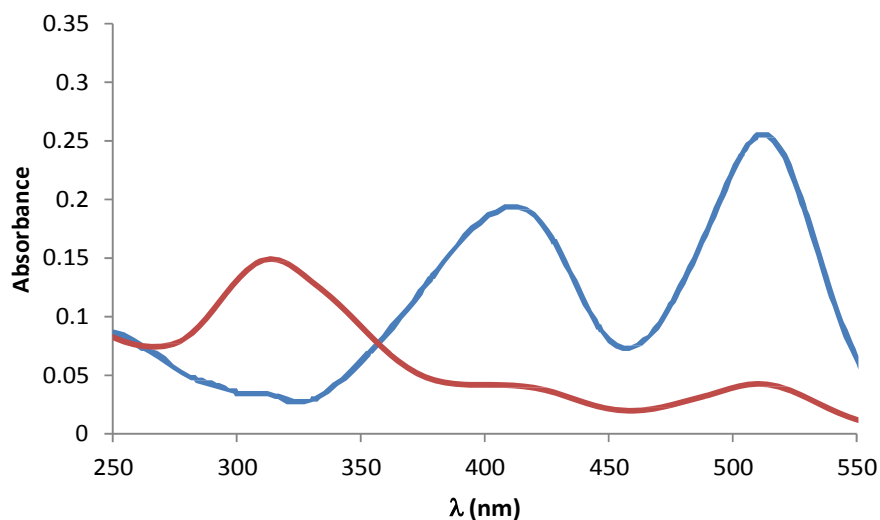

**Figure SI-3.** UV spectra of (red) **1** ( $1 \times 10^{-5}$  M in  $\text{CH}_3\text{CN}$ ) + 5 equiv NaHS (in  $\text{H}_2\text{O}$ ) (blue) the same solution after addition of 10  $\mu\text{L}$  of  $\text{H}_2\text{O}_2$  (6v)

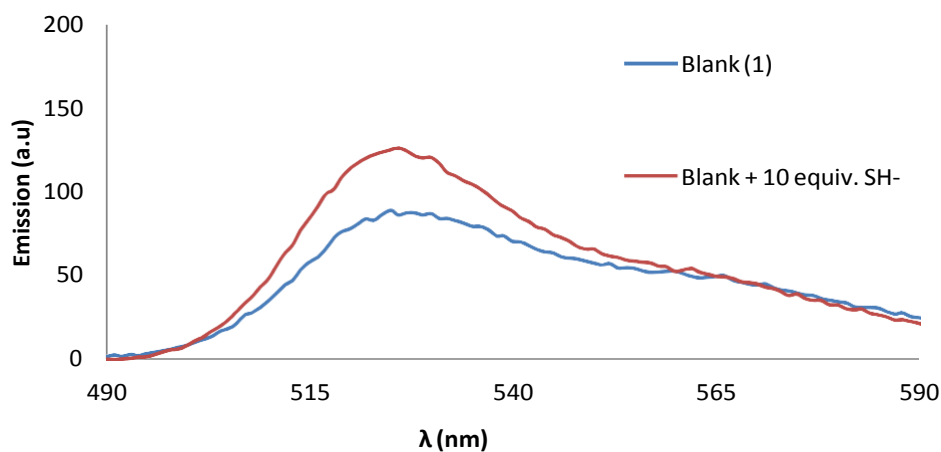

**Figure SI-4.** Fluorescence spectra of (blue) **1** ( $1 \times 10^{-5}$  M in  $\text{CH}_3\text{CN}$ ) and (red) **1** ( $1 \times 10^{-5}$  M in  $\text{CH}_3\text{CN}$ ) + 10 equiv NaHS (in  $\text{H}_2\text{O}$ ).

**Limit of detection (LOD) determination:** Increasing quantities of a solution of the corresponding anion ( $1 \times 10^{-4}$  mol  $\text{dm}^{-3}$  in water) were added to a solution of **1** ( $1.0 \times 10^{-5}$  mol  $\text{dm}^{-3}$  in acetonitrile). The UV spectra were recorded in 1-cm path length cells at  $25^\circ\text{C}$ .

Representation of absorbance at a specific wavelength vs. concentration of anion allowed calculation of LOD.

$$\text{LOD} = \frac{3S_b}{m}$$

In which  $S_b$  is the standard deviation of blank measurements and  $m$  is the slope of the linear regression plot.<sup>1</sup>

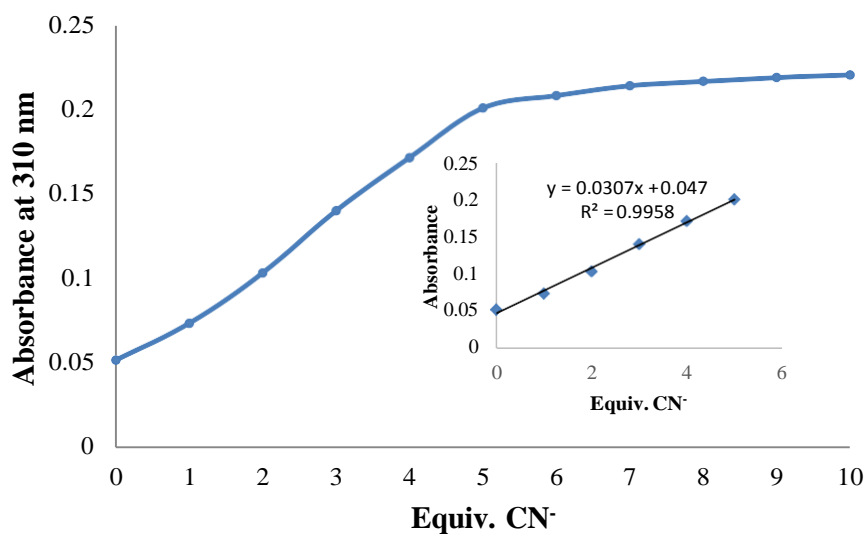

**Figure SI-5.** Absorption at 310 nm of 1-CN<sup>-</sup> (acetonitrile solution, 10<sup>-5</sup>M) versus increasing amounts of CN<sup>-</sup> (1x10<sup>-4</sup> M in water) at room temperature. (Inset: linear part of the graph)

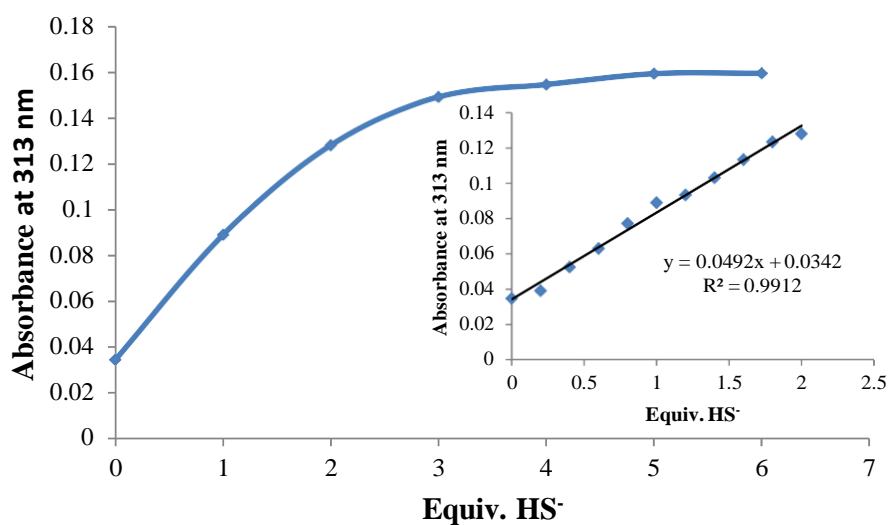

**Figure SI-6.** Absorption at 313 nm of **1**-HS<sup>-</sup> (acetonitrile solution, 10<sup>-5</sup>M) *versus* increasing amounts of HS<sup>-</sup> (1x10<sup>-4</sup> M in water) at room temperature. (Inset: linear part of the graph)

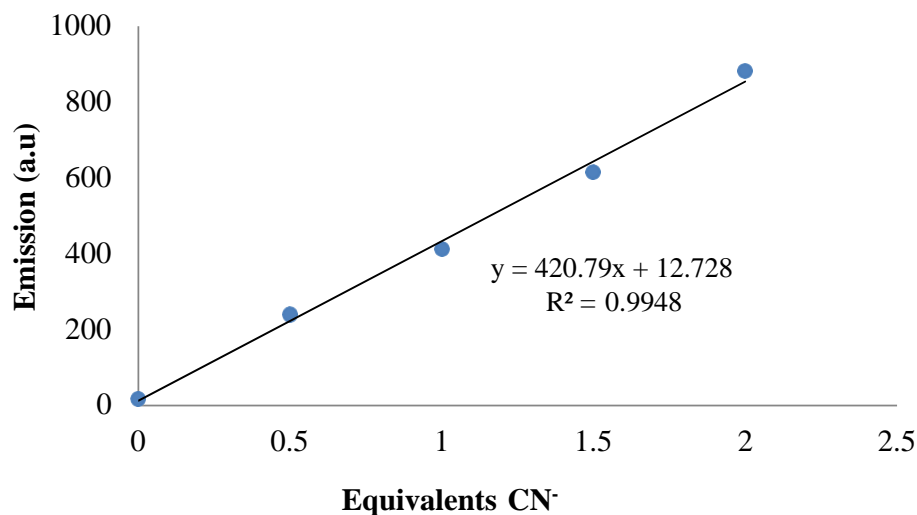

**Figure SI-7.** Linear part of the titration graph in fluorescence of **1** (acetonitrile solution, 10<sup>-5</sup>M) *versus* increasing amounts of CN<sup>-</sup> (1x10<sup>-4</sup> M in water) at room temperature.

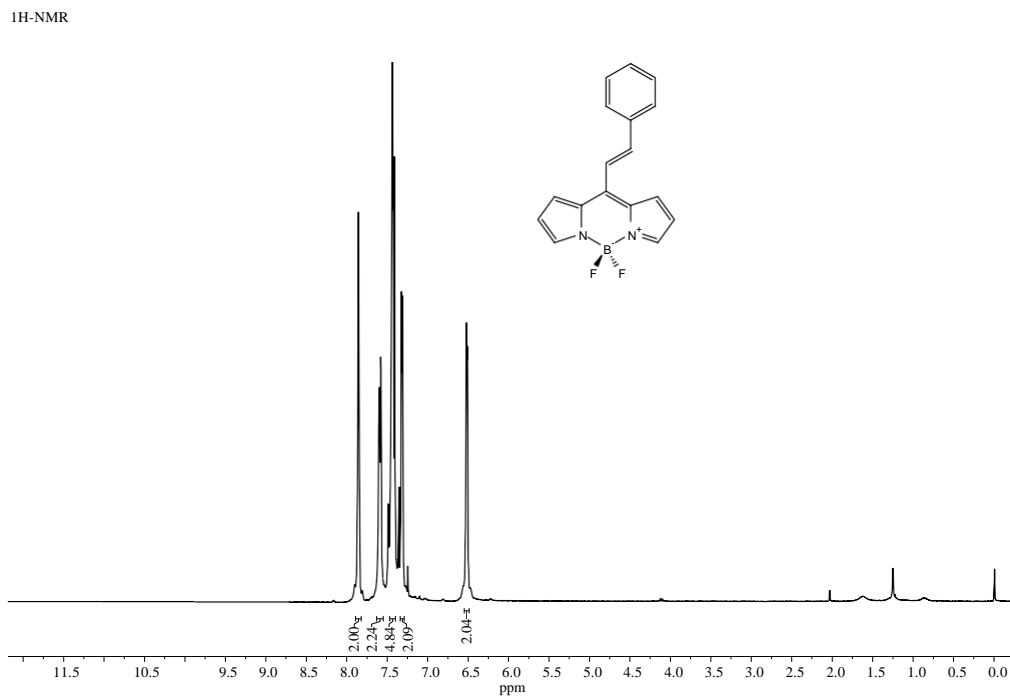

**Figure SI-8.** <sup>1</sup>H NMR spectrum of compound **1** in CDCl<sub>3</sub>

<sup>13</sup>C-NMR

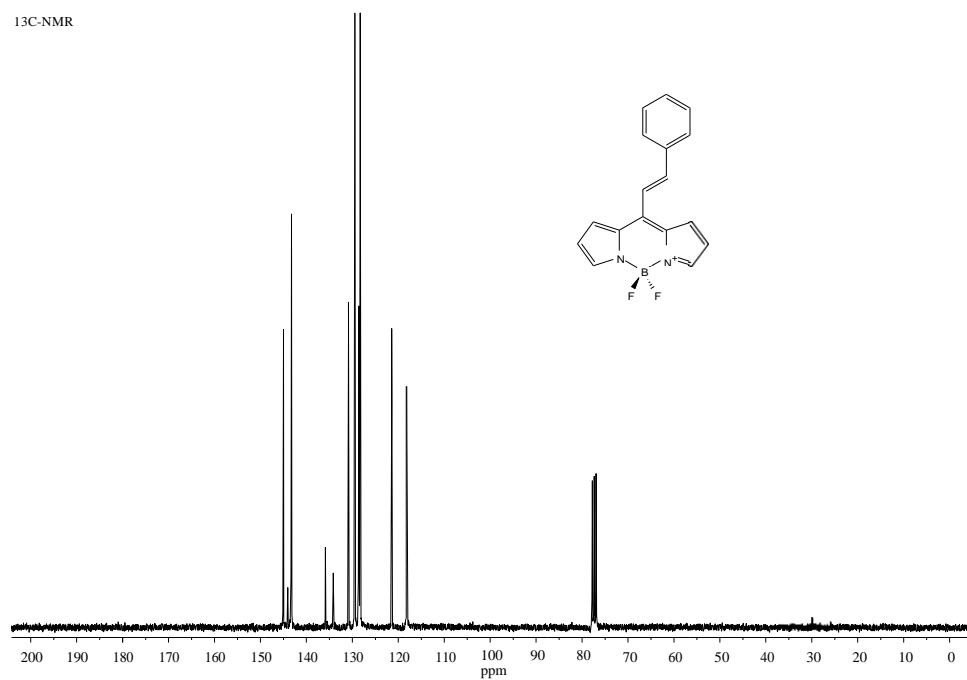

Figure SI-9. <sup>13</sup>C NMR spectrum of compound 1 in CDCl<sub>3</sub>

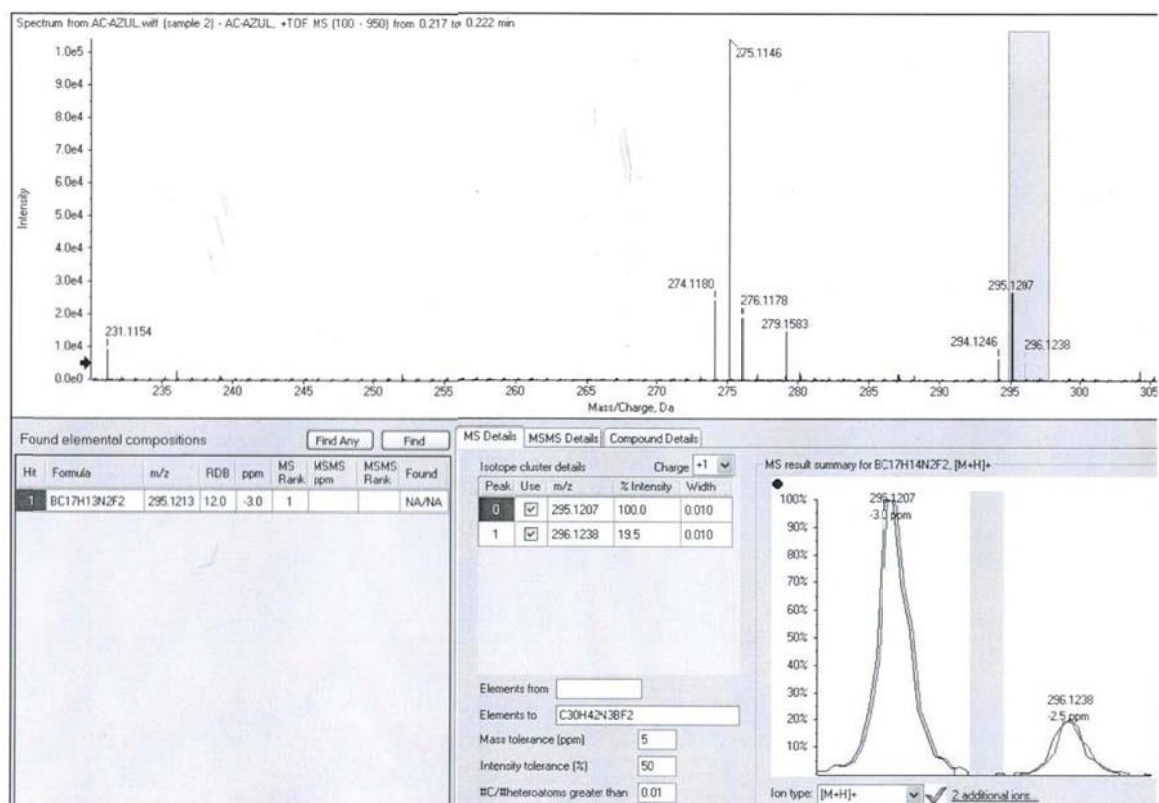

Figure SI-10. MS of compound 1

<sup>1</sup>H-NMR

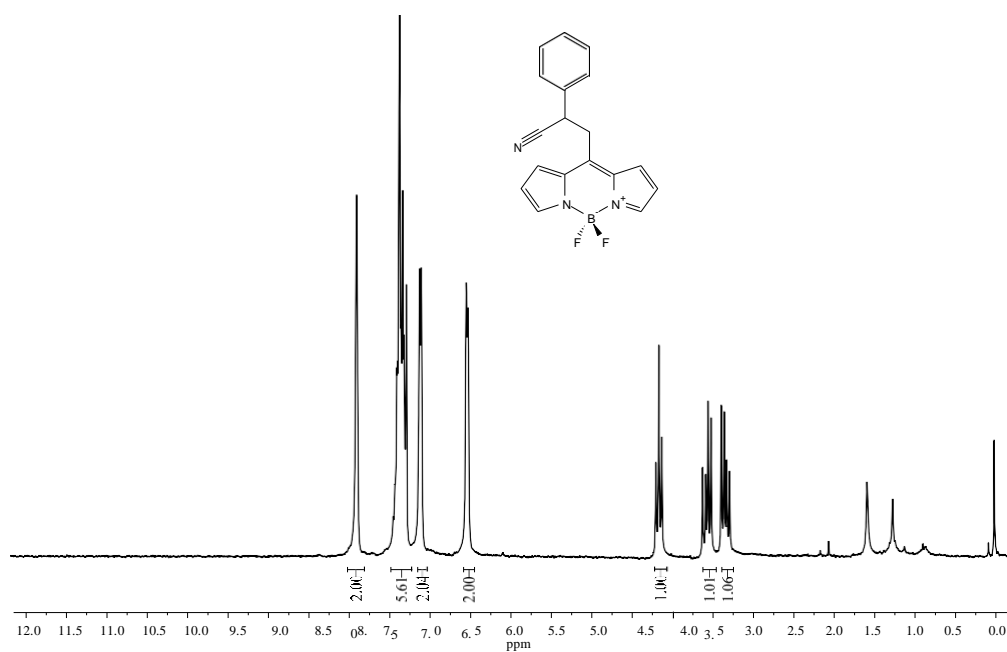

**Figure SI-11.** <sup>1</sup>H NMR spectrum of compound **2** in CDCl<sub>3</sub>

<sup>13</sup>C-NMR

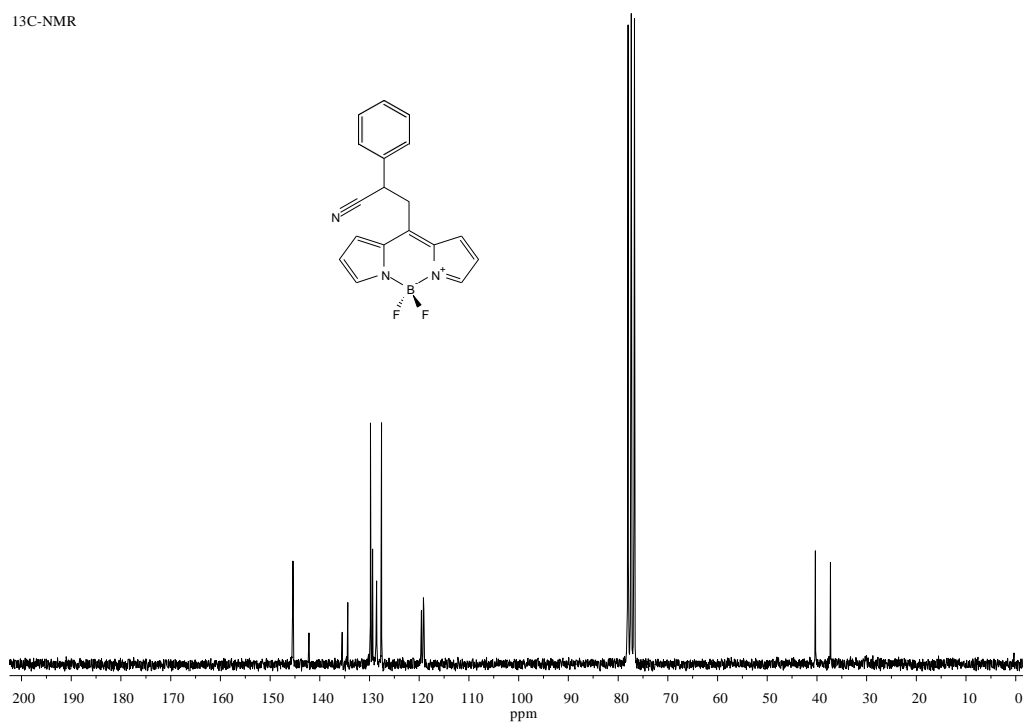

**Figure SI-12.** <sup>13</sup>C NMR spectrum of compound **2** in CDCl<sub>3</sub>



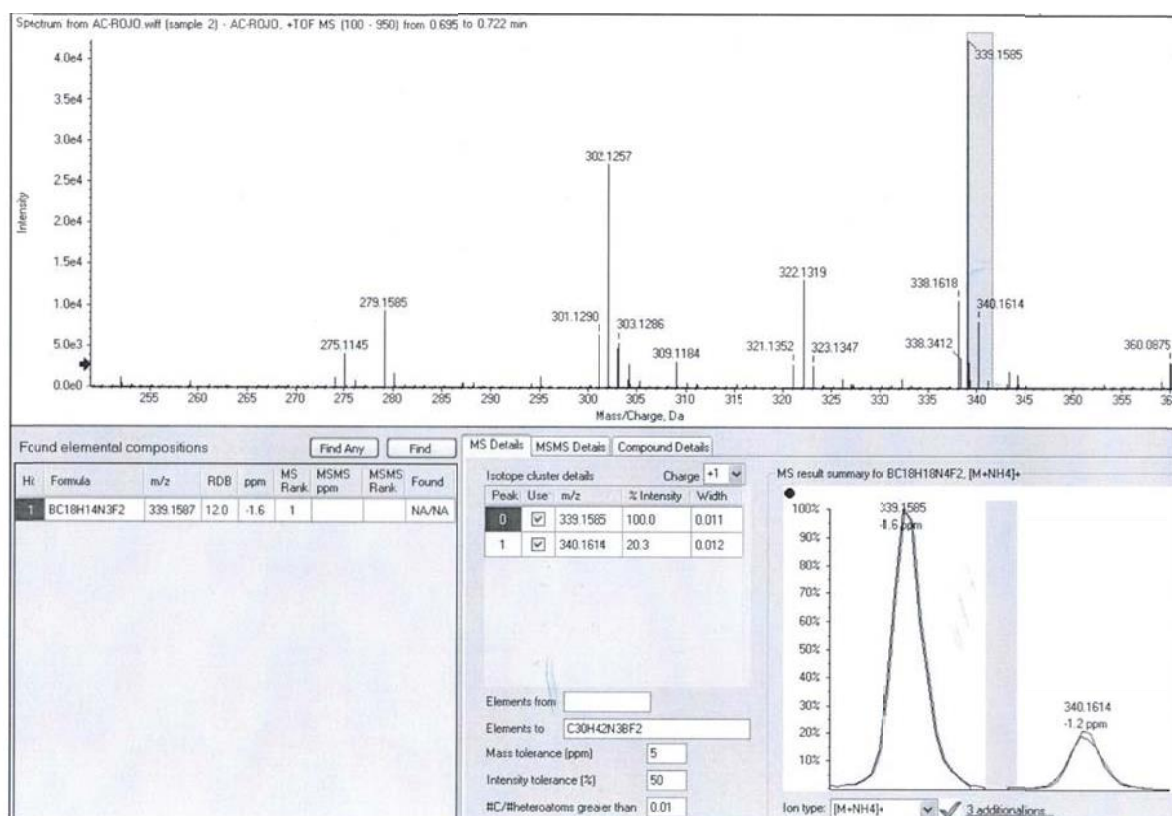

**Figure SI-13.** MS of compound **2**

1. M. Zhu, M. Yuan, X. Liu, J. Xu, J. Lv, C. Huang, H. Liu, Y. Li, S. Wang, D. Zhu, *Org. Lett.*, 2008, **10**, 1481.
